# Supplementary material for: Ultrafine Pd3Pb intermetallic nanowires with Mott–Schottky effect achieve a complete oxidation pathway for methanol oxidation catalysis
Source: Royal Society of Chemistry journal article supplement (doi:10.1039/d4gc01955e), 2024-01-01
Supplement: d4gc01955e1.pdf [file d4gc01955e1.pdf]

## Supporting Information

# Ultrafine Pd<sub>3</sub>Pb Intermetallic Nanowires with Mott Schottky effect Achieves Complete Oxidation Pathway for Methanol Oxidation Catalysis

Shuanglong Zhou<sup>a</sup>, Zuochao Wang<sup>a</sup>, Mo Zhang<sup>b</sup>, Xiaoming Mou<sup>c</sup>, Yu Dai<sup>d</sup>, Lei Wang<sup>a</sup> and Jianping Lai<sup>a,\*</sup>

<sup>a</sup> Key Laboratory of Eco-Chemical Engineering, Key Laboratory of Optic-electric Sensing and Analytical Chemistry of Life Science, Taishan Scholar Advantage and Characteristic Discipline Team of Eco-Chemical Process and Technology, College of Chemistry and Molecular Engineering, Qingdao University of Science and Technology, Qingdao 266042 (China)

<sup>b</sup> Xiamen Key Laboratory of Rare Earth Photoelectric Functional Materials, Xiamen Institute of Rare Earth Materials, Haixi Institute, Chinese Academy of Sciences, Xiamen 361021 (China)

<sup>c</sup> Analytical & Testing Center, Qingdao University of Science and Technology, Qingdao, 266042 (China)

<sup>d</sup> College of Foreign Languages, Qingdao City University, Qingdao 266106 (China)

Shuanglong Zhou, Zuochao Wang and Mo Zhang contributed equally to this work.

\*Corresponding author.

E-mail addresses: [jplai@qust.edu.cn](mailto:jplai@qust.edu.cn) (J. Lai)

### Direct methanol fuel cell test

A membrane electrodes assembly (MEA) were prepared with 20 wt% commercial Pt/C and Pd<sub>3</sub>Pb IM/MNC as anode and cathode, respectively. The loading amounts of commercial Pt/C and Pd<sub>3</sub>Pb IM/MNC on 1.1 × 1.1 cm<sup>2</sup> electrode were 1.5 mg and 2 mg, respectively. MEA was prepared at 150 °C with a hot press impact of 70 kg/cm<sup>2</sup> for 120 seconds. Nafion 115 membrane is used to separate the anode and cathode. The assembled MEA was activated for 3 hours before testing. MEA was tested at 70 °C and the flow rates of methanol and oxygen were 1.5 mL/min and 150 mL/min, respectively.

### In-situ FTIR test

The intermediate products during the MOR process were detected by *in-situ* FTIR through Thermo iS50 FT-IR with a liquid-nitrogen-cooled MCT-A detector. The in-situ FTIR curves were collected by the method of internal reflection. Firstly, the catalysts modified silicon crystal plated with gold was used as working

electrode, Ag/AgCl and Pt wire were worked as reference electrode and counter electrode respectively. All the tests were conducted in N<sub>2</sub> saturated 0.1 M KOH with 0.5 M methanol. The applied potential was stepped positively from 0.1 V to 1.2 V (*vs.* RHE) with an interval of 100 mV. Secondly, the results of in-situ FTIR were reported as relative change in absorbance:  $\Delta R/R = (R(ES)-R(ER))/R(ER)$ . The R(ES) and R(ER) are the spectra collected at the applied potential and reference potential (0.1 V *vs.* RHE). The upward bands represent the formation of products, the downward bands represent the consumption of reactants.

### **DFT calculation**

The present first principle DFT calculations are performed by Vienna Ab initio Simulation Package (VASP) with the projector augmented wave (PAW) method. The exchange-functional is treated using the generalized gradient approximation (GGA) of Perdew-Burke-Emzerhof (PBE) functional. The energy cutoff for the plane wave basis expansion was set to 450 eV and the force on each atom less than 0.05 eV/Å was set for convergence criterion of geometry relaxation. Grimme's DFT-D3 methodology was used to describe the dispersion interactions. Partial occupancies of the Kohn-Sham orbitals were allowed using the Gaussian smearing method and a width of 0.05 eV. The Brillouin zone was sampled with Monkhorst mesh 4×4×1 through all the computational process. The self-consistent calculations apply a convergence energy threshold of 10<sup>-5</sup> eV. A 15 Å vacuum space along the z direction was added to avoid the interaction between the two neighboring images. The free energy ( $\Delta G$ ) on those catalysts was defined as:

$$\Delta G = E_{DFT} + E_{ZPE} - T \times S$$

where  $E_{DFT}$ ,  $E_{ZPE}$ ,  $T$  and  $S$  are the calculation total energy of intermediate on catalysts surface, the zero-point energy, temperature and entropy.

Supporting Figures:

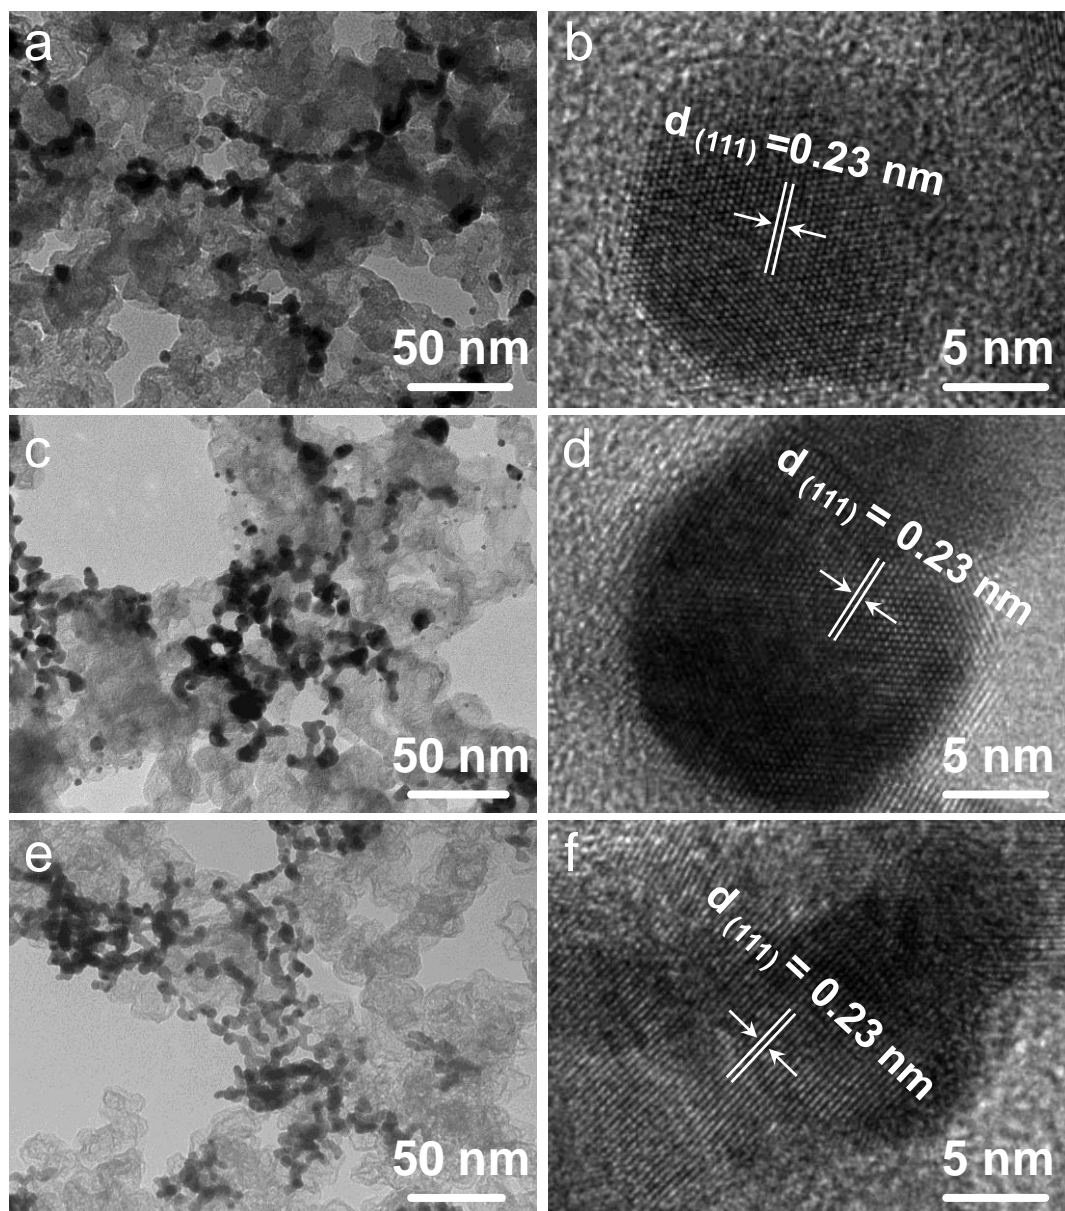

Fig. S1. TEM (a) and HRTEM (b) images of Pd<sub>3</sub>Pb IM/C. TEM (c) and HRTEM (d) images of Pd<sub>3</sub>Pb IM/LNC. TEM (e) and HRTEM (f) images of Pd<sub>3</sub>Pb IM/HNC.

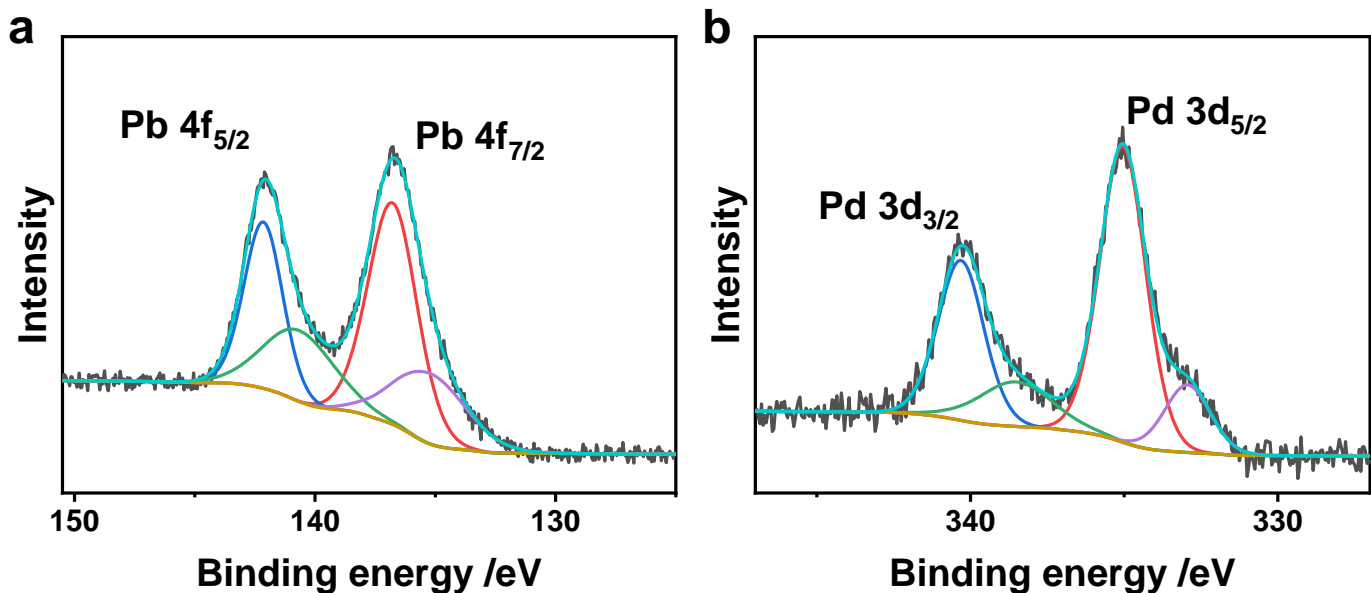

Fig. S2. XPS spectrum of Pd<sub>3</sub>Pb IM/C.

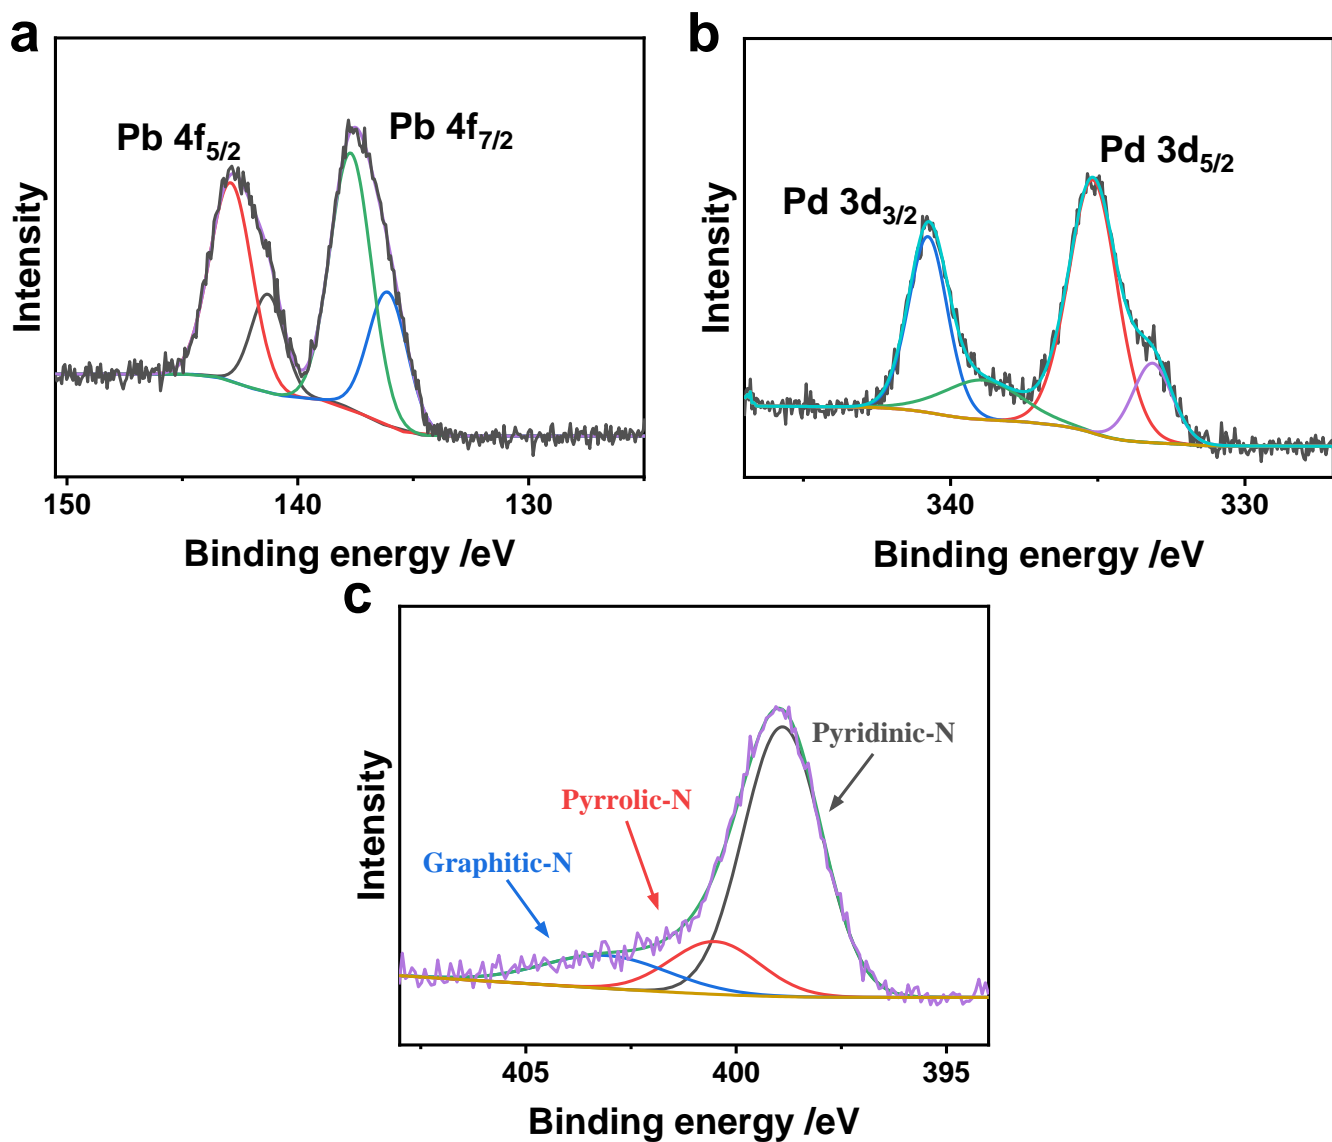

Fig. S3. XPS spectrum of Pd<sub>3</sub>Pb IM/HNC.

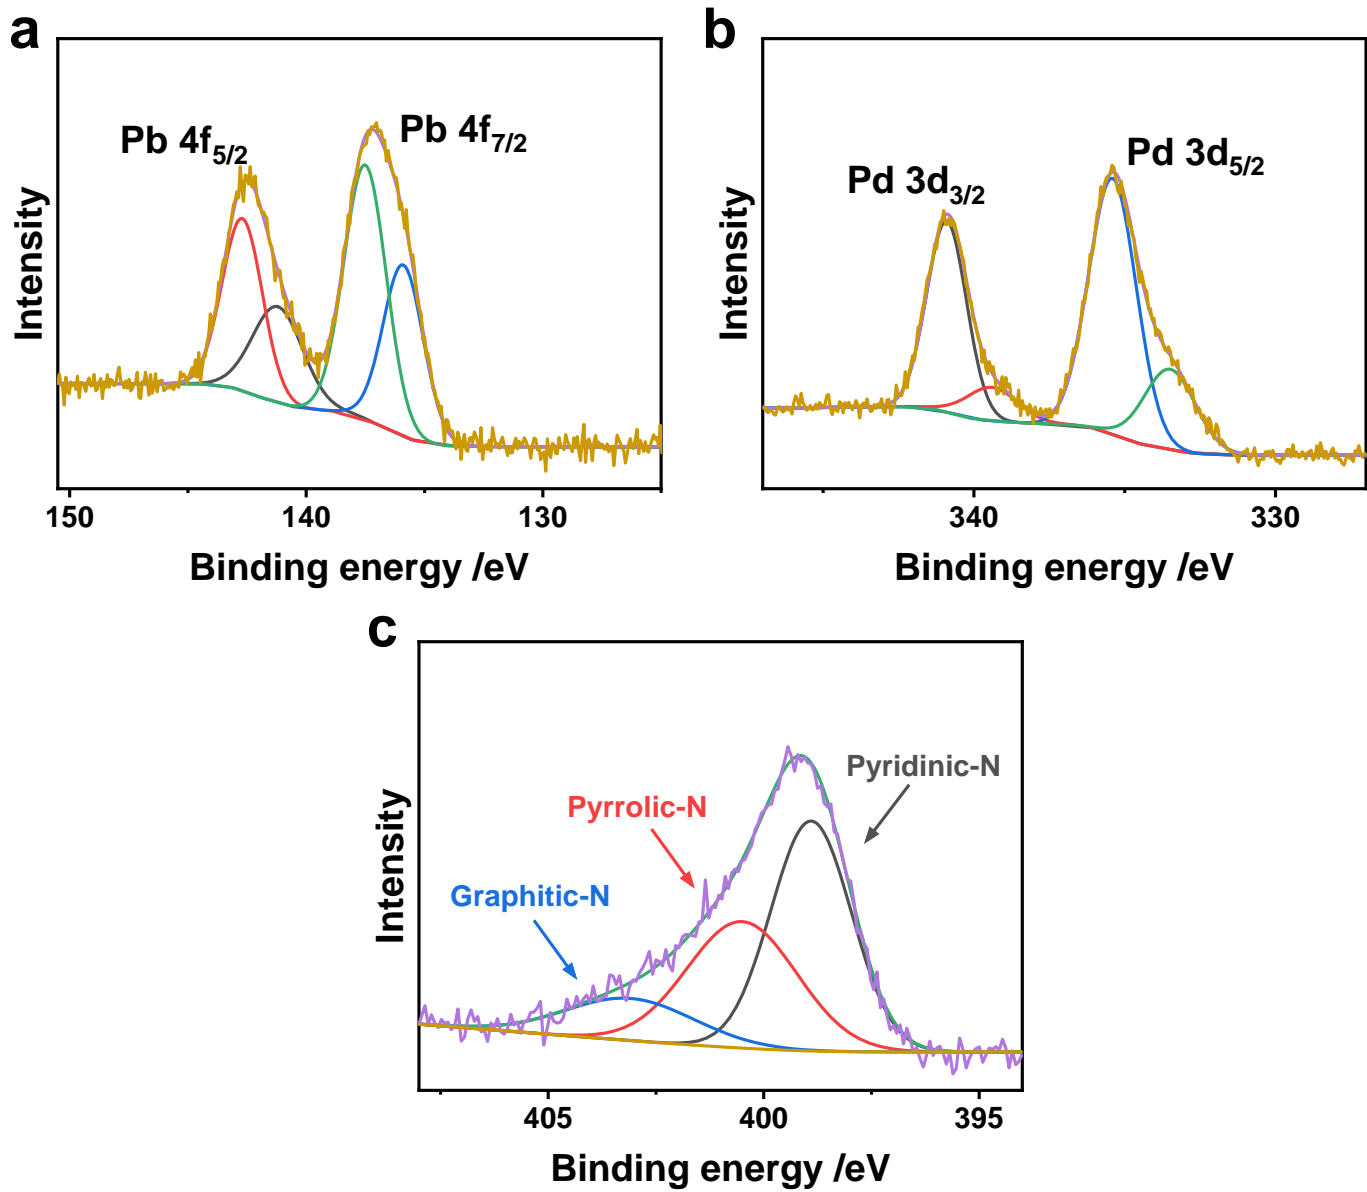

Fig. S4. XPS spectrum of Pd<sub>3</sub>Pb IM/MNC.

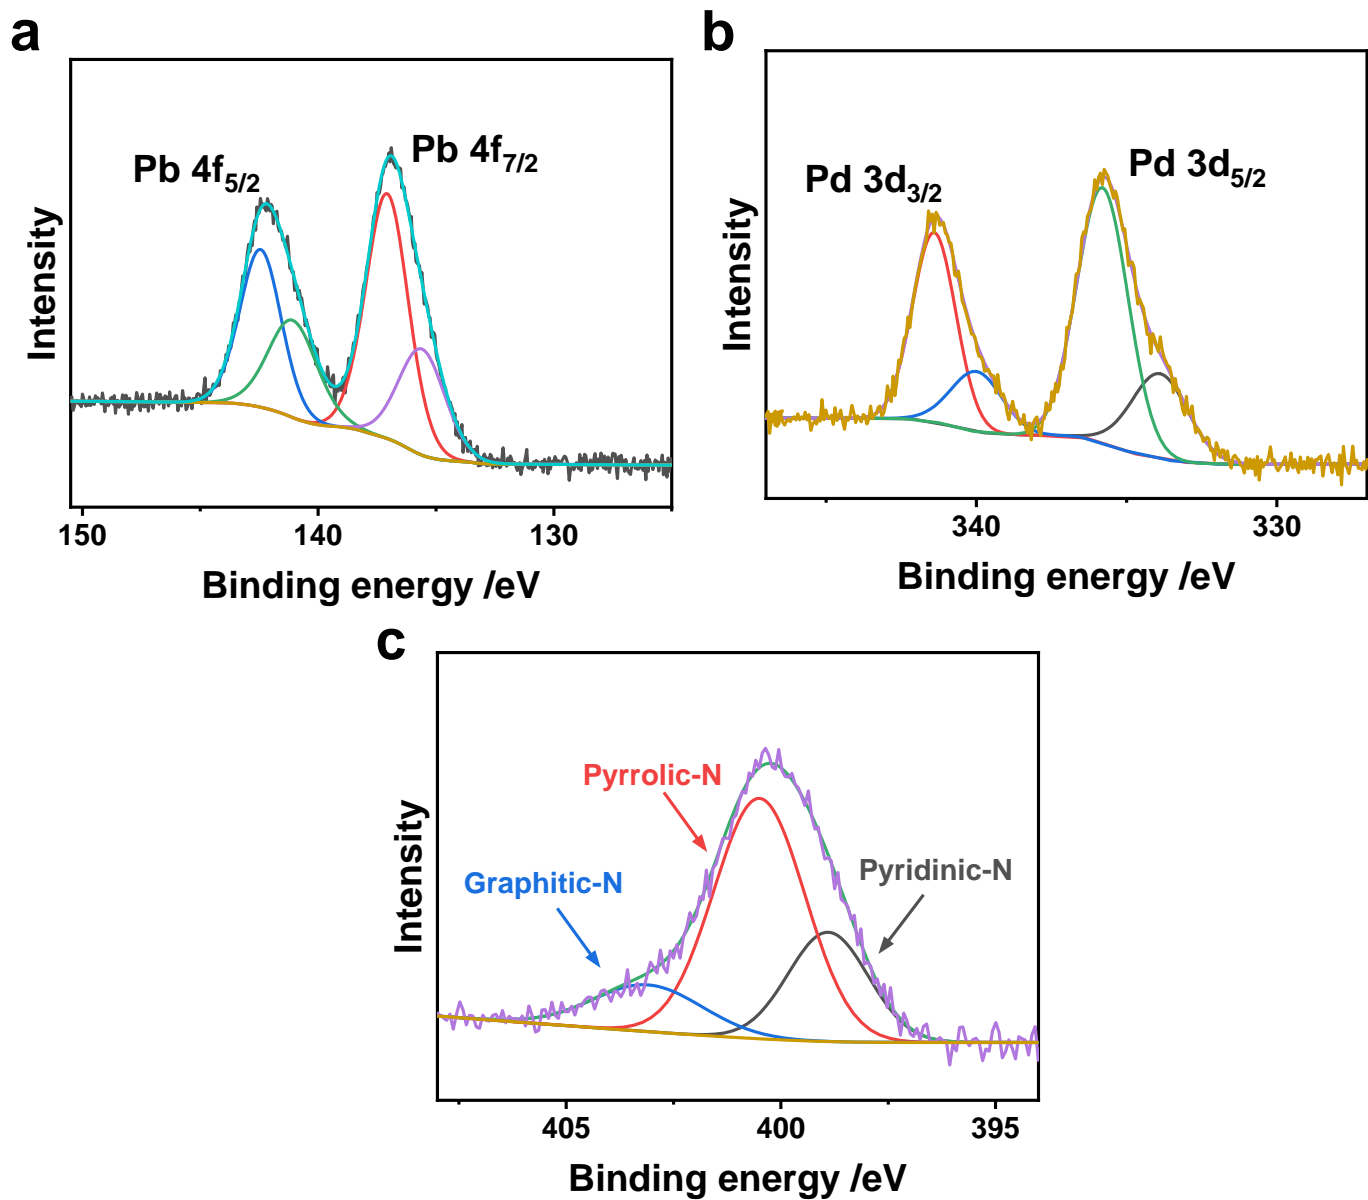

Fig. S5. XPS spectrum of Pd<sub>3</sub>Pb IM/LNC.

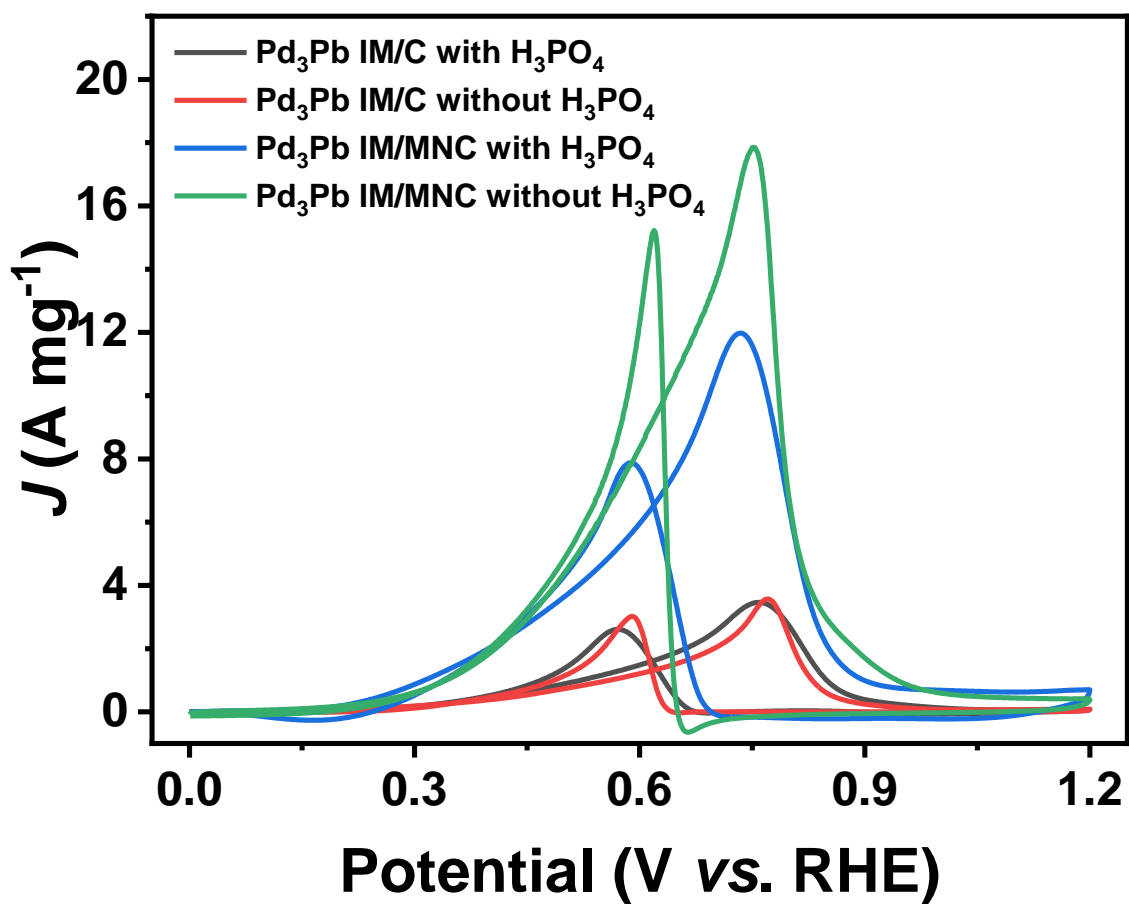

Fig. S6. Control experiment of blocking pyridinic-N.

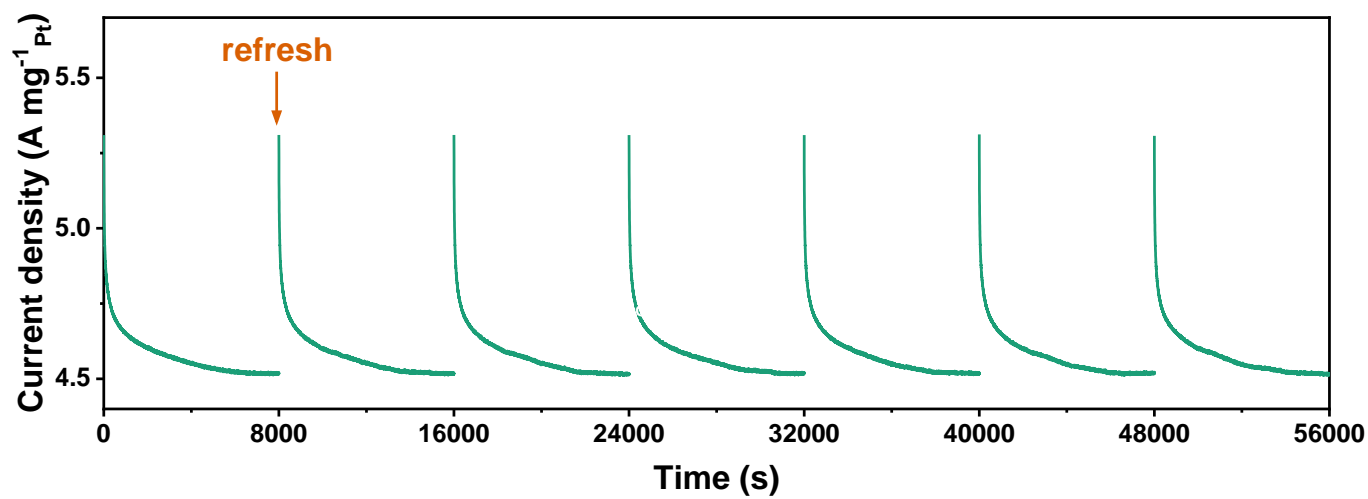

Fig. S7. The 56000 second stability test curve of Pd<sub>3</sub>Pb IM/MNC.

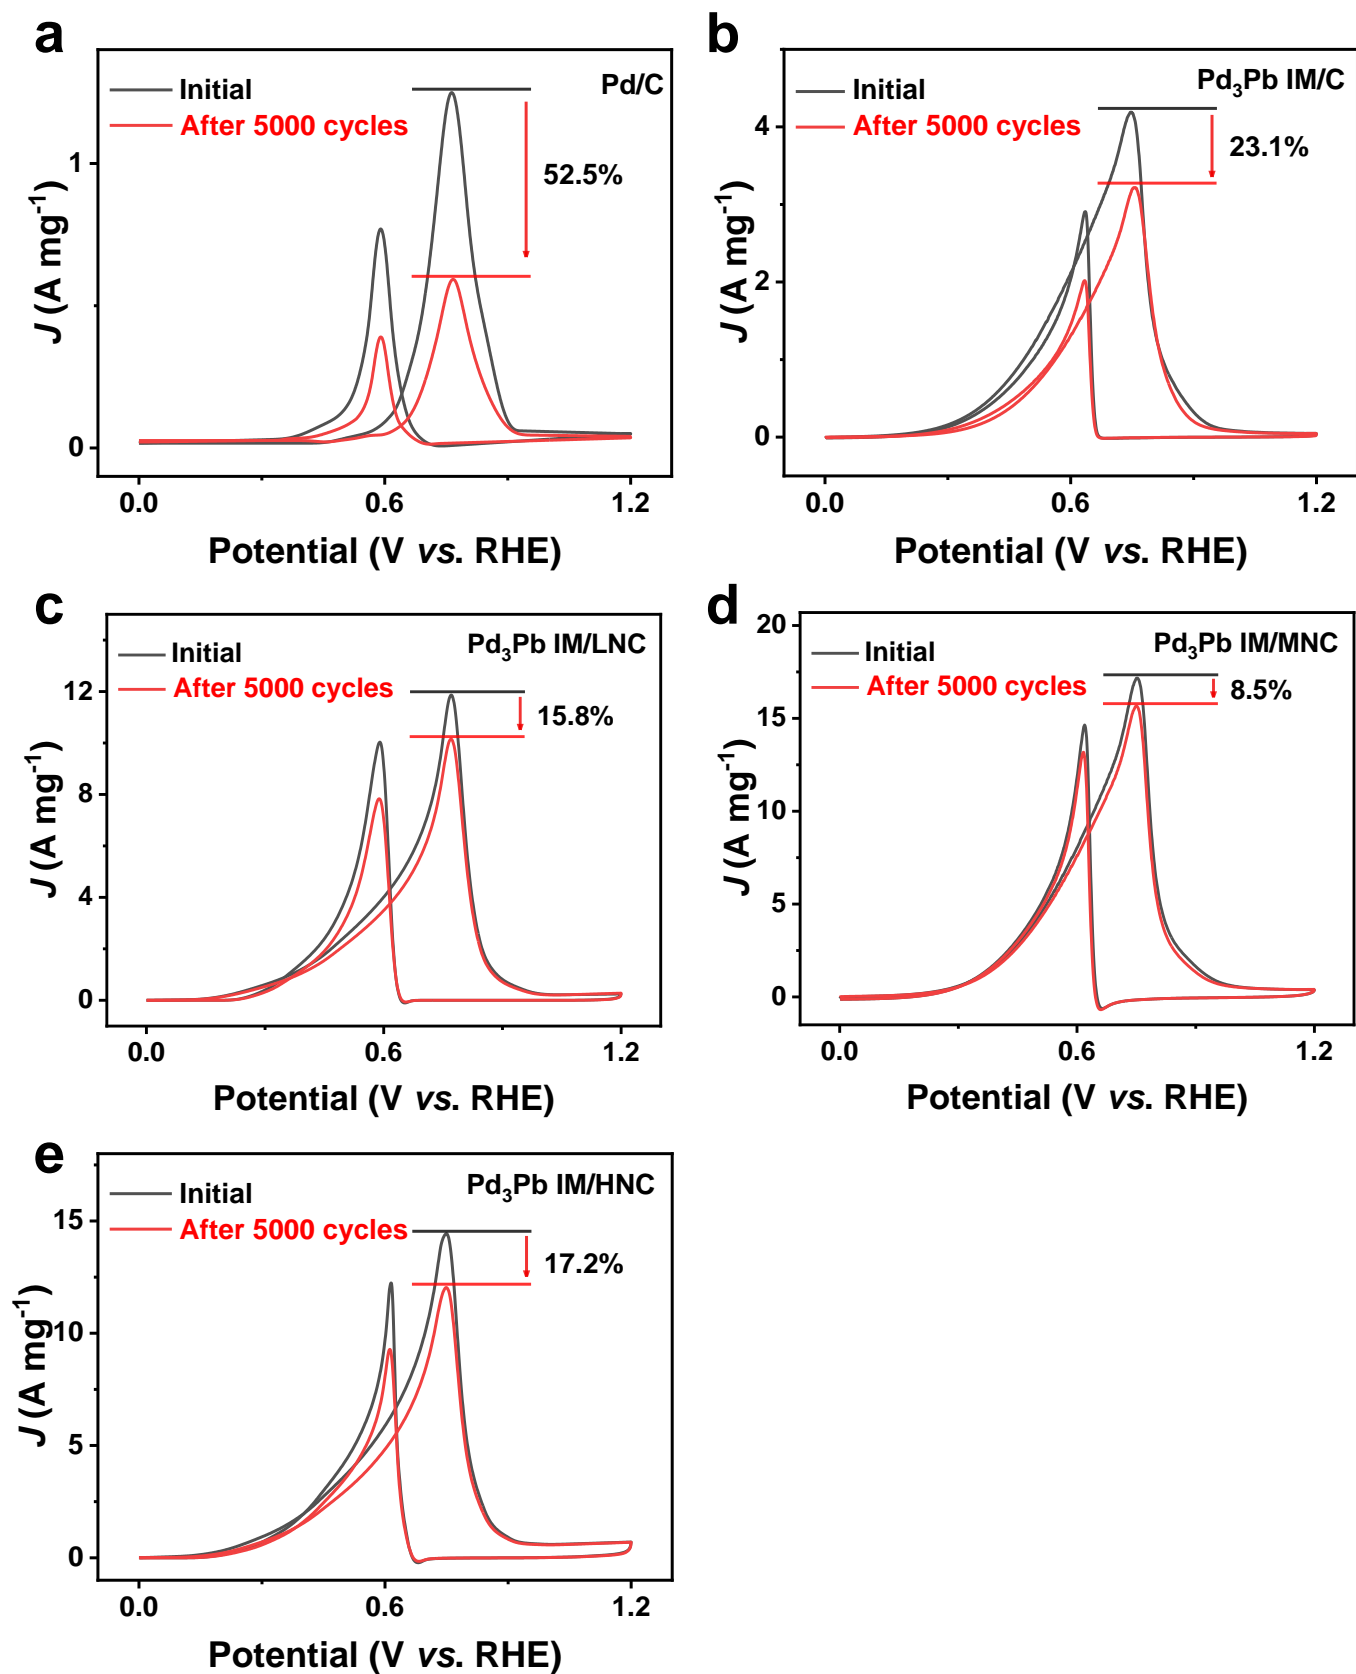

Fig. S8. 5000 CV cycles of synthesized catalysts. (a)Pd/C. (b)Pd<sub>3</sub>Pb IM/C. (c) Pd<sub>3</sub>Pb IM/LNC. (d) Pd<sub>3</sub>Pb IM/MNC. (e) Pd<sub>3</sub>Pb IM/HNC.



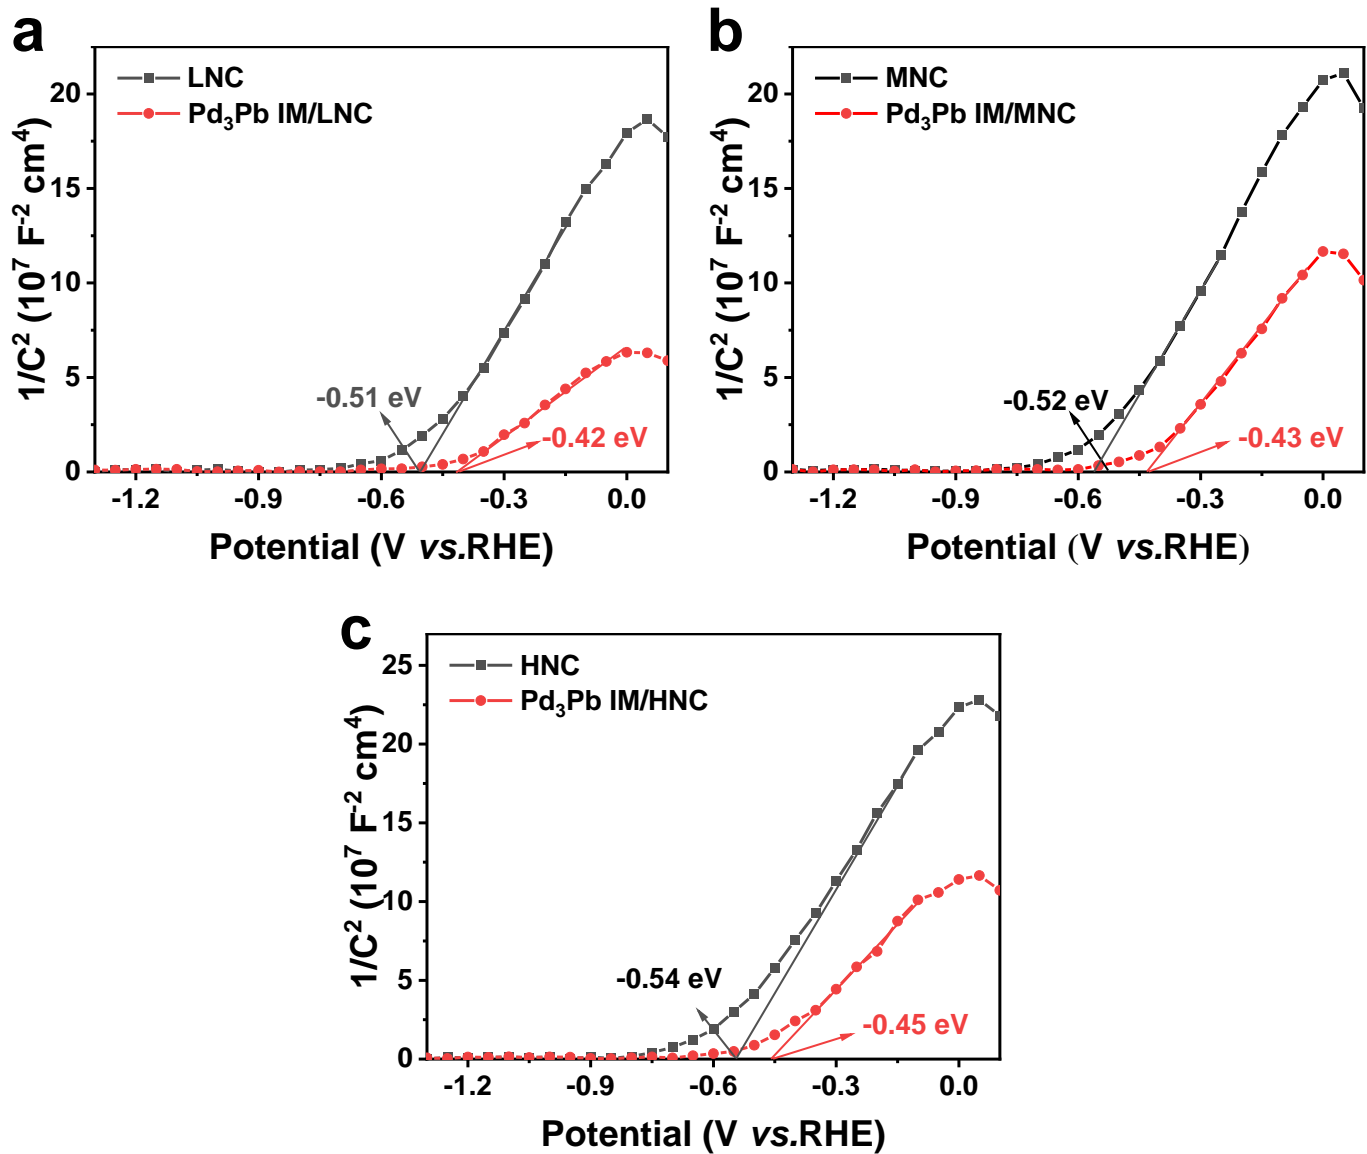

Fig. S9. Mottschotky test of synthesized catalysts.

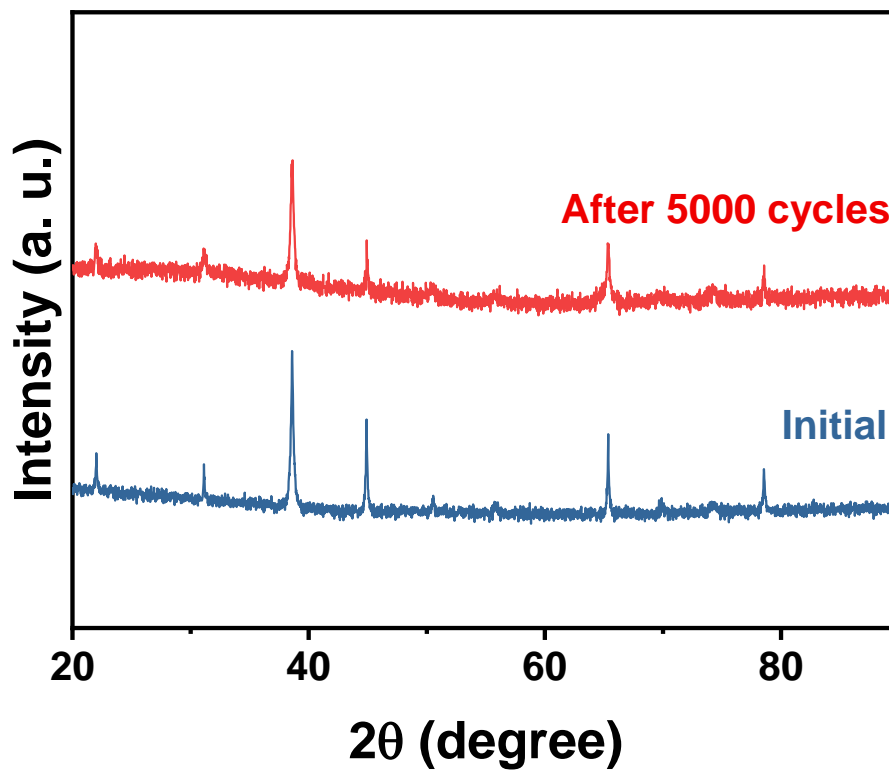

Fig. S10. The XRD pattern of Pd<sub>3</sub>Pb IM/MNC after cyclic testing.

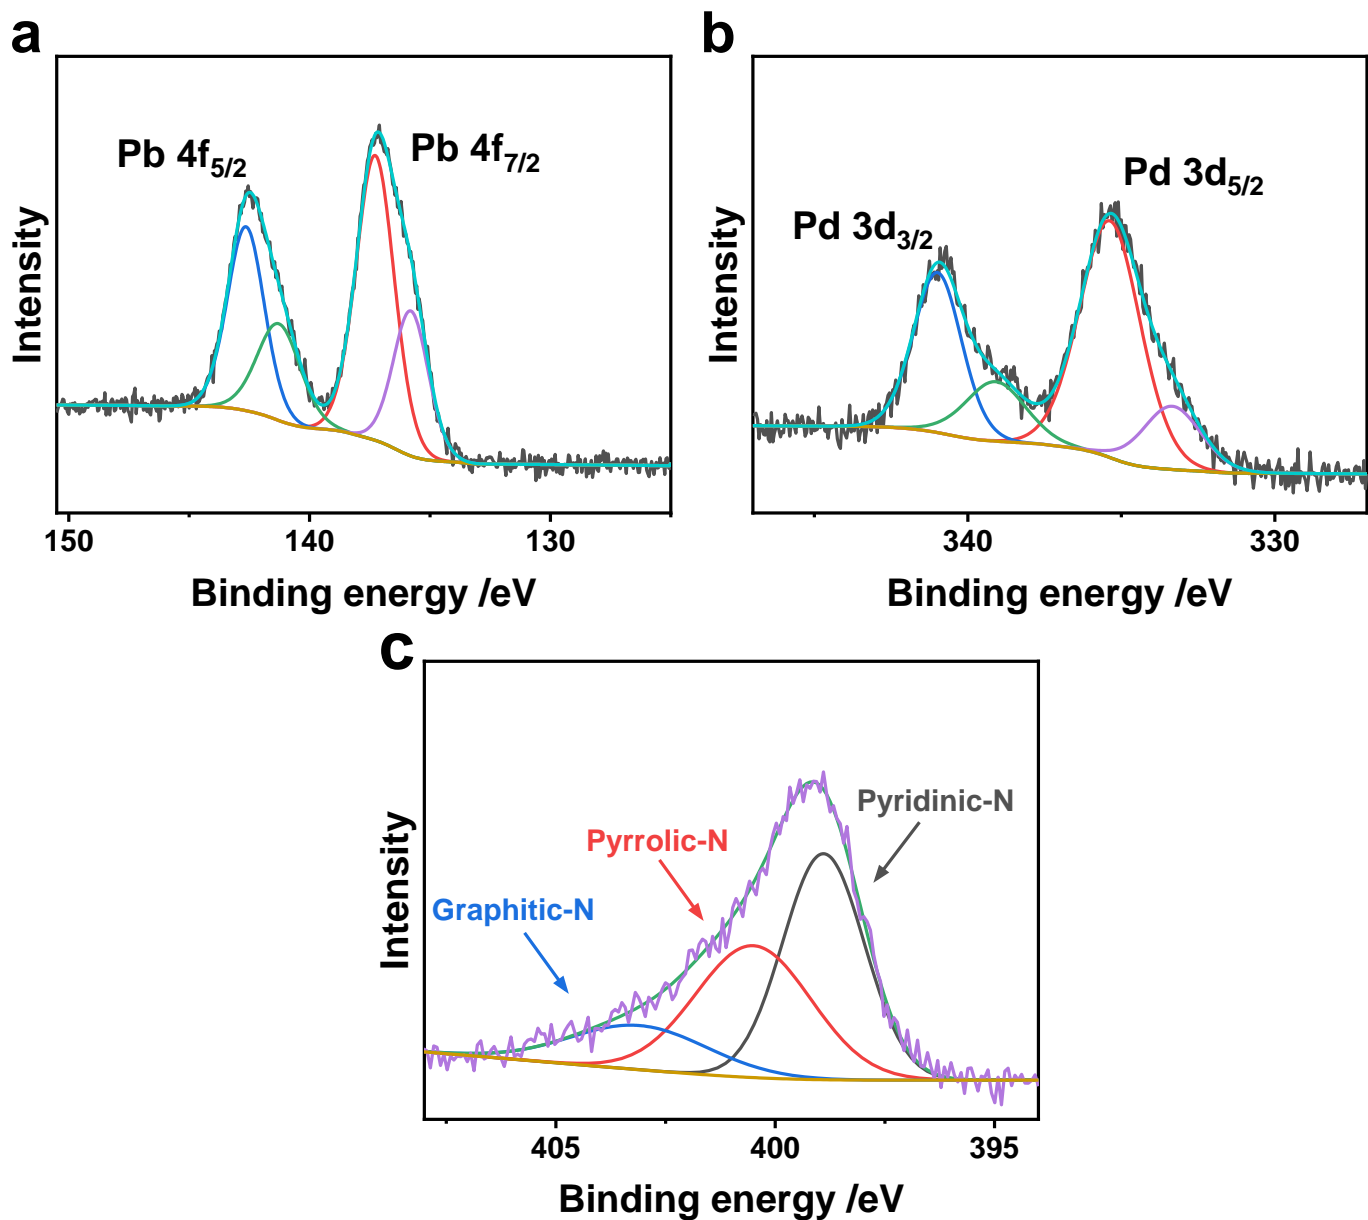

Fig. S11. The XPS of Pd<sub>3</sub>Pb IM/MNC after cyclic testing.

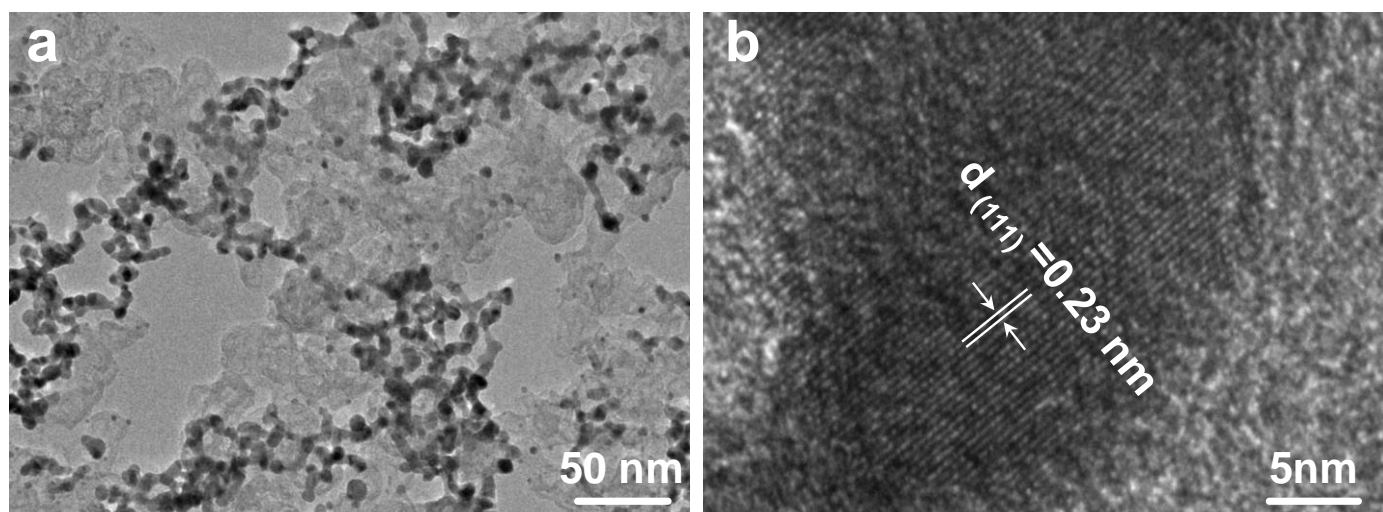

Fig. S12. TEM and HRTEM of Pd<sub>3</sub>Pb IM/MNC after cyclic testing.

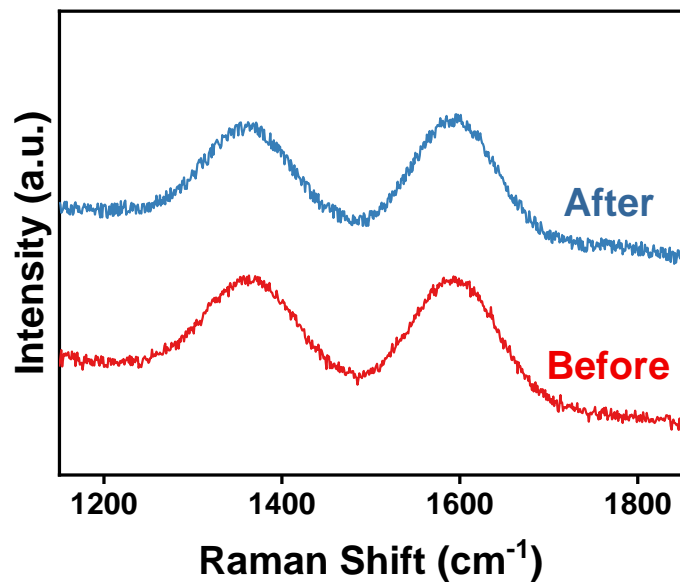

Fig. S13. Raman spectra of Pd<sub>3</sub>Pb IM/MNC before and after cycle test.

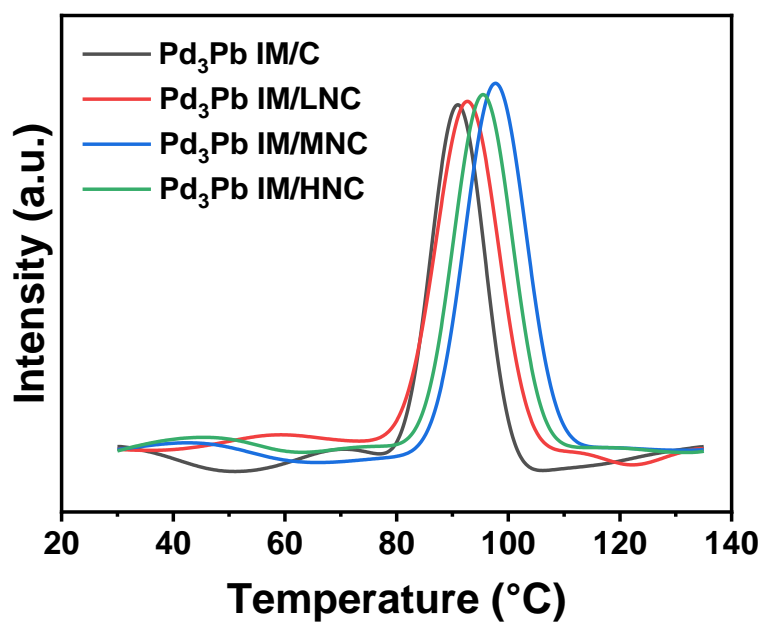

Fig. S14. TPD testing of the synthesized catalyst for CO.

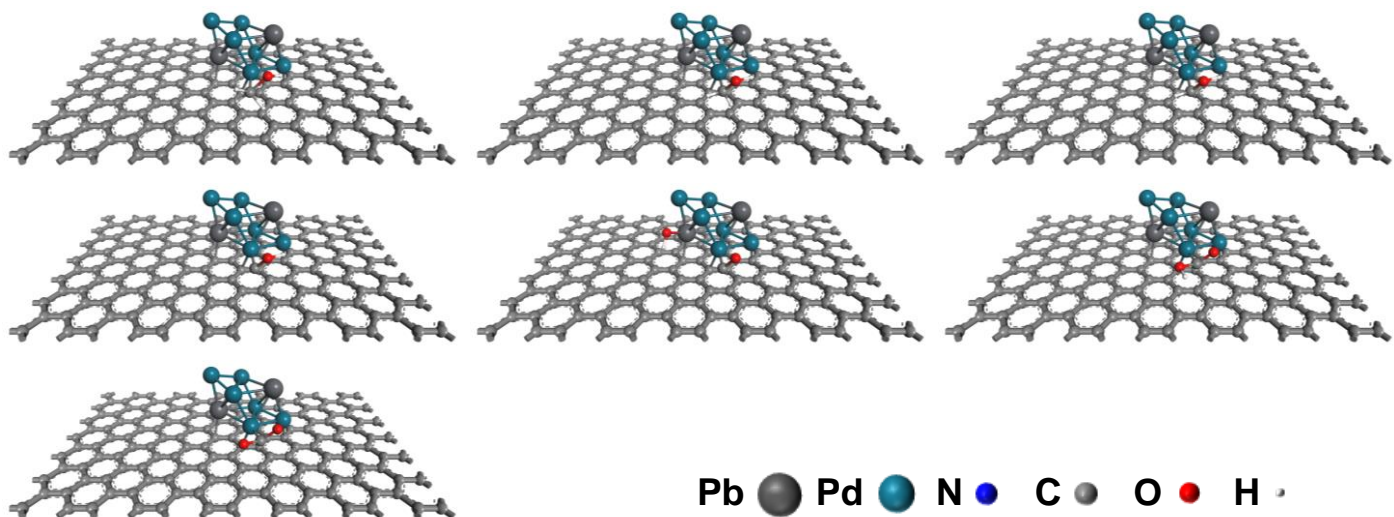

Fig. S15. Scheme of the intermediates involved in MOR catalyzed by Pd<sub>3</sub>Pb IM/C model.

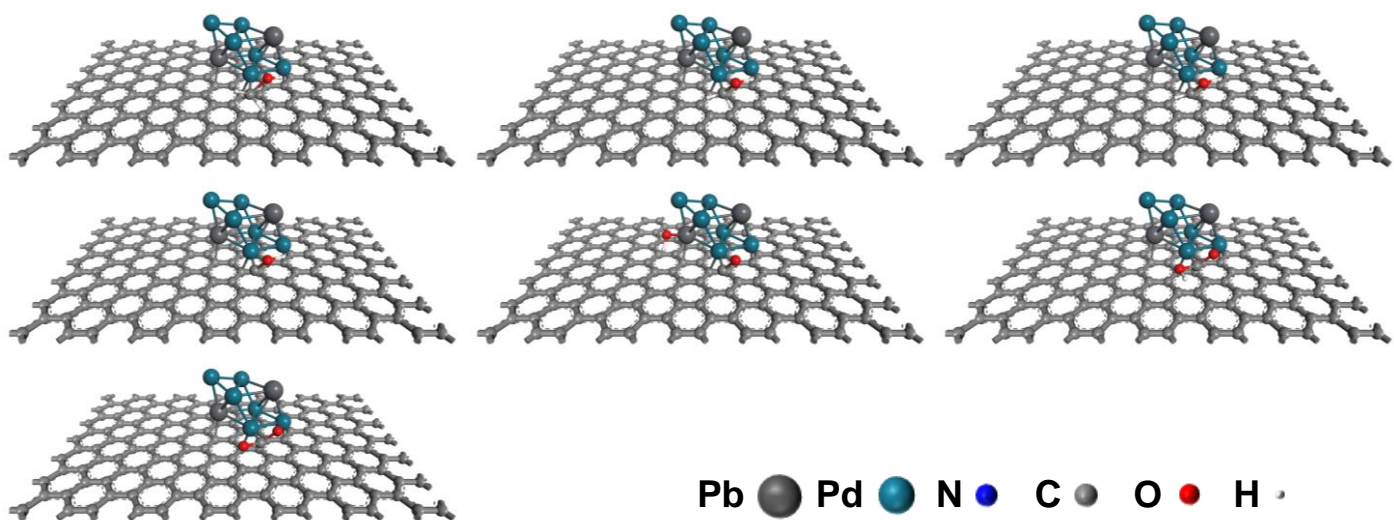

Fig. S16. Scheme of the intermediates involved in MOR catalyzed by Pd<sub>3</sub>Pb IM/MNC model.

**Table S1.** The results of EDS quantitative analysis.

| Samples                   | Atomic ratio / % |      |       |       |
|---------------------------|------------------|------|-------|-------|
|                           | Pd               | Pb   | C     | N     |
| Pd <sub>3</sub> Pb IM/MNC | 5.96             | 1.92 | 78.58 | 13.54 |

**Table S2.** The specific binding energies of elements in the synthesized materials

| Samples                   | Binding energy (eV) |       |            |             |
|---------------------------|---------------------|-------|------------|-------------|
|                           | Pd 3d               | Pb 4f | pyrrolic-N | pyridinic-N |
| Pd <sub>3</sub> Pb IM/C   | 142.1               | 340.3 | 400.5      | 403.1       |
| Pd <sub>3</sub> Pb IM/LNC | 142.7               | 340.7 |            |             |
| Pd <sub>3</sub> Pb IM/MNC | 142.5               | 340.9 |            |             |
| Pd <sub>3</sub> Pb IM/HNC | 142.2               | 341.4 |            |             |

**Table S3.** The proportion of pyridinic-N to pyrrolic-N.

| Samples                   | Proportion |
|---------------------------|------------|
| Pd <sub>3</sub> Pb IM/LNC | 3.2        |
| Pd <sub>3</sub> Pb IM/MNC | 1.02       |
| Pd <sub>3</sub> Pb IM/HNC | 0.43       |

**Table S4.** Comparison of the catalytic performances with the representative high performance MOR electrocatalysts in alkaline electrolytes that reported recently.

| Catalysts                       | Electrolyte                  | MA / A mg <sup>-1</sup> | SA / mA cm <sup>-2</sup> | Potential (V vs. REH) | Stability (decay / 100%) | Ref          |
|---------------------------------|------------------------------|-------------------------|--------------------------|-----------------------|--------------------------|--------------|
| Pd <sub>3</sub> Pb MNC          | 1.0 M KOH+<br>1.0 M methanol | 17.83                   | 21.75                    | 0.75                  | 8.5%                     | This work    |
| PdNW@cCuO <sub>x</sub>          | 1.0 M KOH+<br>1.0 M methanol | -                       | 6.17                     | 0.89                  | 10.4%                    | <sup>1</sup> |
| Pd <sub>3</sub> Sn <sub>2</sub> | 1.0 M KOH+<br>1.0 M methanol | 1.3                     | -                        | 0.85                  | 83%                      | <sup>2</sup> |

|                                                        |                               |      |       |      |       |    |
|--------------------------------------------------------|-------------------------------|------|-------|------|-------|----|
| CrO <sub>x</sub> -Pd/C                                 | 1.0 M NaOH+<br>1.0 M methanol | 2.05 | 5.3   | 0.82 | 12%   | 3  |
| Ptc/Ti <sub>3</sub> C <sub>2</sub> T <sub>x</sub>      | 1.0 M KOH+<br>1.0 M methanol  | 7.32 | -     | 0.34 | 31%   | 4  |
| Pd <sub>NPs</sub> /Pd-N <sub>x</sub> @C                | 1.0 M KOH+<br>1.0 M methanol  | 9.45 | -     | 0.79 | 9.6%  | 5  |
| Pd <sub>3</sub> Ni <sub>1</sub> -TaN/C,                | 1.0 M NaOH+<br>1.0 M methanol | 3.6  | -     | 0.82 | 12%   | 6  |
| Pd-UNs/Cl-GDY                                          | 1.0 M KOH+<br>1.0 M methanol  | 3.6  | -     | 1.09 | 5%    | 7  |
| PdAgSn/PtBi                                            | 1.0 M KOH+<br>1.0 M methanol  | 2.8  | 4.7   | 0.9  | 52.5% | 8  |
| PdSn <sub>0.5</sub> /Se Ti <sub>3</sub> C <sub>2</sub> | 1 M NaOH+<br>1 M methanol     | 4.7  |       | 1.0  | 14.5% | 9  |
| Pd <sub>3</sub> Pb/Pt <sub>2.37</sub> Pb               | 1.0 M KOH+<br>1.0 M methanol  | 8.4  | 13.68 |      | 40%   | 10 |

**Table S5.** The proportion of pyridinic-N to pyrrolic-N in Pd<sub>3</sub>Pb IM/MNC after cycle test.

| Samples                   | Proportion |
|---------------------------|------------|
| Pd <sub>3</sub> Pb IM/MNC | 1.01       |

## References

1. T. Hu, W. Chen, Y. Liu, L. Gong, Z. Jiang, D. Bhalothia, T. Maiyalagan and Z. J. Jiang, *Small*, 2023, **19**, e2304076.
2. J. Xue, Z. Hu, H. Li, Y. Zhang, C. Liu, M. Li, Q. Yang and S. Hu, *Nano Res.*, 2022, **15**, 8819-8825.
3. Y. Qiu, J. Fan, J. Wu, W. Lu, S. Wang, D. Wang, X. Ge, X. Zhao, W. Zhang, W. Zheng and X. Cui, *Nano Lett.*, 2023, **23**, 9555-9562.
4. J. Zhu, L. Xia, R. Yu, R. Lu, J. Li, R. He, Y. Wu, W. Zhang, X. Hong, W. Chen, Y. Zhao, L. Zhou, L. Mai and Z. Wang, *J. Am. Chem. Soc.*, 2022, **144**, 15529-15538.
5. L. Zhuang, Z. Jia, Y. Wang, X. Zhang, S. Wang, J. Song, L. Tian and T. Qi, *Chem. Eng. J.*, 2022, **438**.
6. N. Ye, P. Zhao, X. Qi, R. Zhang, B. Yan, W. Sheng, Z. Jiang and T. Fang, *Appl. Catal. B Environ.*, 2023, **322**.
7. X. Zhang, L. Hui, D. Yan, J. Li, X. Chen, H. Wu and Y. Li, *Angew. Chem. Int. Ed.*, 2023, **62**, e202308968.

8. X. Lao, X. Liao, C. Chen, J. Wang, L. Yang, Z. Li, J. W. Ma, A. Fu, H. Gao and P. Guo, *Angew. Chem. Int. Ed.*, 2023, **62**, e202304510.
9. S. Chen, N. Liu, J. Zhong, R. Yang, B. Yan, L. Gan, P. Yu, X. Gui, H. Yang, D. Yu, Z. Zeng and G. Yang, *Angew. Chem. Int. Ed.*, 2022, **61**, e202209693.
10. X. Wu, Y. Jiang, Y. Yan, X. Li, S. Luo, J. Huang, J. Li, R. Shen, D. Yang and H. Zhang, *Adv. Sci.*, 2019, **6**, 1902249.
